# Supplementary material
Source: Elsevier journal article supplement (https://www.sciencedirect.com/science/article/pii/S260515321930233X)
Supplement: mmc1 [file S260515321930233X:mmc1.pdf]

## **Adherencia al ejercicio físico en mujeres tras completar un programa de rehabilitación cardiaca**

### **Material adicional**

#### **Cuestionario utilizado y diferencias con respecto al utilizado en EUROASPIRE V**

El cuestionario incluyó todas las variables sobre actividad física utilizadas en EUROASPIRE V al que teníamos acceso por ser centro participante en EUROASPIRE V.

La diferencia entre el cuestionario empleado en este trabajo y el del estudio EUROASPIRE V radica fundamentalmente en que, además de valorar la actividad física, se han incluido diferentes variables para relacionar la adherencia al ejercicio con diversos factores de la esfera psicosocial de cada paciente y conocer, si existen, la razones principales que pueden conducir al abandono del ejercicio

El cuestionario utilizado en este estudio consta de tres apartados:

1. **Actividad Física:** basado en el punto 2.6 *Physical Activity* del cuestionario utilizado en el estudio EUROASPIRE V. Hemos añadido la cuestión «¿Qué tipo de ejercicio o deporte es el que más realiza habitualmente?» por considerar esta una información de interés a la hora de lograr una mayor individualización en el seguimiento de las pacientes que han finalizado el programa de RC.
2. **Cambios en el estilo de vida:** Este apartado valora, de forma específica para este estudio, lo siguiente:
  - Si la adherencia al ejercicio físico es mayor en aquellas pacientes que mantienen un seguimiento, evaluación y control adecuados por parte del profesional.
  - Si medidas políticas locales, como convenios deportivos, influyen positivamente en la adherencia al ejercicio.

- Si las pacientes están satisfechas con la cantidad de deporte que realizan y, por tanto, no se proponen incrementarlo.
- Si existen diferencias estadísticamente significativas en la adherencia al ejercicio entre las pacientes que realizan ejercicio físico solas o las que lo hacen acompañadas.

**3. Otras cuestiones:** También realizado de forma específica para este estudio, está centrado, sobre todo, en valorar los aspectos psicosociales que pueden influir en la adherencia al ejercicio, como estar al cuidado de un familiar o ser laboralmente activas.

## Cuestionario de adherencia al ejercicio físico en mujeres

NHC: \_\_\_\_\_ Telf.: \_\_\_\_\_ Edad: \_\_\_\_\_

## 1. Actividad Física

|                                                                                                                                                                                                                                                                                                                                                                                                                                                                                                                                                                                                                                                                                                                                    |                                                                                                                                                                                                                                                                                                                                                                                                                                  |
|------------------------------------------------------------------------------------------------------------------------------------------------------------------------------------------------------------------------------------------------------------------------------------------------------------------------------------------------------------------------------------------------------------------------------------------------------------------------------------------------------------------------------------------------------------------------------------------------------------------------------------------------------------------------------------------------------------------------------------|----------------------------------------------------------------------------------------------------------------------------------------------------------------------------------------------------------------------------------------------------------------------------------------------------------------------------------------------------------------------------------------------------------------------------------|
| 1.1 En el momento actual, ¿tiene alguna enfermedad no relacionada con su enfermedad cardíaca?                                                                                                                                                                                                                                                                                                                                                                                                                                                                                                                                                                                                                                      | <input type="checkbox"/> Sí<br><input type="checkbox"/> No<br><input type="checkbox"/> No lo sé                                                                                                                                                                                                                                                                                                                                  |
| 1.2 En caso afirmativo, ¿le supone una limitación a la hora de realizar ejercicio físico?                                                                                                                                                                                                                                                                                                                                                                                                                                                                                                                                                                                                                                          | <input type="checkbox"/> Sí<br><input type="checkbox"/> No<br><input type="checkbox"/> No lo sé                                                                                                                                                                                                                                                                                                                                  |
| 1.3 ¿Cuál considera que es su nivel de actividad física?                                                                                                                                                                                                                                                                                                                                                                                                                                                                                                                                                                                                                                                                           | <input type="checkbox"/> No realizo ninguna actividad física a la semana<br><input type="checkbox"/> Solo actividad física ligera o moderada casi todas las semanas<br><input type="checkbox"/> Al menos 20 minutos de actividad física vigorosa una o dos veces por semana<br><input type="checkbox"/> Al menos 20 minutos de actividad física vigorosa tres o más veces por semana<br><input type="checkbox"/> No estoy segura |
| 1.5 ¿Qué tipo de ejercicio o deporte es el que más realiza habitualmente?<br>_____                                                                                                                                                                                                                                                                                                                                                                                                                                                                                                                                                                                                                                                 |                                                                                                                                                                                                                                                                                                                                                                                                                                  |
| 1.4 ¿Cuántas veces a la semana realiza alguna de las actividades que se citan a continuación?<br>- Actividad física vigorosa ( <i>por ejemplo: correr, ciclismo de larga distancia, entrenamiento de circuito, baile aeróbico, saltos, fútbol, baloncesto, patinaje sobre ruedas, natación vigorosa</i> ): _____<br><input type="checkbox"/> No estoy segura<br>- Actividad física moderada ( <i>por ejemplo: caminar rápido, cortar el césped, tenis, ciclismo fácil, natación fácil, baile de salón, caminar con paso rápido</i> ): _____<br><input type="checkbox"/> No estoy segura<br>- Actividad física ligera ( <i>por ejemplo: pasear, jugar al golf, baile lento</i> ): _____<br><input type="checkbox"/> No estoy segura |                                                                                                                                                                                                                                                                                                                                                                                                                                  |
| 1.6 ¿Realiza, al menos, 30 minutos de ejercicio físico, 5 veces a la semana (de media)?                                                                                                                                                                                                                                                                                                                                                                                                                                                                                                                                                                                                                                            | <input type="checkbox"/> Sí<br><input type="checkbox"/> No<br><input type="checkbox"/> No estoy segura                                                                                                                                                                                                                                                                                                                           |
| 1.7 ¿Considera usted que realiza ejercicio físico regular?<br>Se considera ejercicio físico regular cualquier actividad planeada con el fin de aumentar la condición física del individuo, llevaba a cabo de 3-5 días por semana durante 20-60 minutos por sesión. Teniendo en cuenta esta definición,                                                                                                                                                                                                                                                                                                                                                                                                                             | <input type="checkbox"/> Sí, desde hace más de 6 meses<br><input type="checkbox"/> Sí, desde hace menos de 6 meses<br><input type="checkbox"/> No, pero tengo intención de empezar en el próximo mes<br><input type="checkbox"/> No, y no tengo intención de empezar en el próximo mes<br><input type="checkbox"/> No estoy segura                                                                                               |

**2. Cambios en el estilo de vida**

|                                                                                                                   |                                                                                                                                                                                          |
|-------------------------------------------------------------------------------------------------------------------|------------------------------------------------------------------------------------------------------------------------------------------------------------------------------------------|
| 2.1 ¿Sigue los consejos de un profesional sanitario o del deporte a la hora de programar su entrenamiento físico? | <input type="checkbox"/> Sí<br><input type="checkbox"/> No<br><input type="checkbox"/> No estoy segura                                                                                   |
| 2.2 ¿Acude a un gimnasio u otro centro especializado en el deporte?                                               | <input type="checkbox"/> Sí<br><input type="checkbox"/> No                                                                                                                               |
| 2.3 ¿Se ha propuesto incrementar su actividad física diaria?                                                      | <input type="checkbox"/> Sí<br><input type="checkbox"/> No<br><input type="checkbox"/> No estoy segura                                                                                   |
| 2.4 ¿Realiza ejercicio físico sola o acompañada?                                                                  | <input type="checkbox"/> Sola<br><input type="checkbox"/> Con un familiar/amigo/grupo<br><input type="checkbox"/> Con mi mascota<br><input type="checkbox"/> No realizo ejercicio físico |

**3. Otras cuestiones**

|                                                                                                                                                         |                                                                                                                                                   |
|---------------------------------------------------------------------------------------------------------------------------------------------------------|---------------------------------------------------------------------------------------------------------------------------------------------------|
| 3.1 Hábito tabáquico:                                                                                                                                   | <input type="checkbox"/> Nunca he sido fumadora<br><input type="checkbox"/> Exfumadora > 1 año<br><input type="checkbox"/> Fumadora activa        |
| 3.2 ¿Cuánto tiempo transcurrió desde que finalizó el programa de rehabilitación cardiaca hasta que comenzó a abandonar la práctica de ejercicio físico? | _____ <input type="checkbox"/> No he abandonado la práctica de ejercicio físico                                                                   |
| 3.3 ¿Por qué razón decidió abandonar la práctica de ejercicio físico diario?                                                                            | _____ <input type="checkbox"/> No he abandonado la práctica de ejercicio físico                                                                   |
| 3.4 ¿Desempeña algún oficio en la actualidad?                                                                                                           | <input type="checkbox"/> Sí<br><input type="checkbox"/> No, desde hace _____                                                                      |
| 3.5 ¿Utiliza alguna <i>app</i> para llevar a cabo su actividad física?                                                                                  | <input type="checkbox"/> Sí<br><input type="checkbox"/> No<br><input type="checkbox"/> No estoy segura                                            |
| 3.6 ¿Vive sola? En caso afirmativo, ¿desde cuándo?                                                                                                      | <input type="checkbox"/> Sí, desde hace _____<br><input type="checkbox"/> No                                                                      |
| 3.7 ¿Considera que cuenta con apoyo familiar/social adecuado? De no ser así, ¿sabría especificar desde cuándo?                                          | <input type="checkbox"/> Sí<br><input type="checkbox"/> No, desde hace _____<br><input type="checkbox"/> No estoy segura                          |
| 3.8 ¿Se encuentra al cuidado de algún familiar? En caso afirmativo, ¿cuántas horas al día dedica a su asistencia?                                       | <input type="checkbox"/> Sí, dedico _____ horas al día a su asistencia<br><input type="checkbox"/> No<br><input type="checkbox"/> No estoy segura |
| 3.9 ¿Ha sido usted hospitalizada desde que finalizó su programa de rehabilitación cardiaca? ¿Por qué motivo?                                            | <input type="checkbox"/> Sí he sido hospitalizada por _____<br><input type="checkbox"/> No<br><input type="checkbox"/> No estoy segura            |

Fig. 1 del material adicional

Estudio de adherencia al ejercicio a los 12, 36 y 60 meses de la finalización del programa de rehabilitación cardiaca.

| Superviviente |          |         |         |        |
|---------------|----------|---------|---------|--------|
| Tiempo        | Abandono | Función | [IC95%] |        |
| 12            | 5        | 0,9462  | 0,8756  | 0,9773 |
| 36            | 9        | 0,7778  | 0,6412  | 0,8676 |
| 60            | 1        | 0,7001  | 0,4859  | 0,8385 |

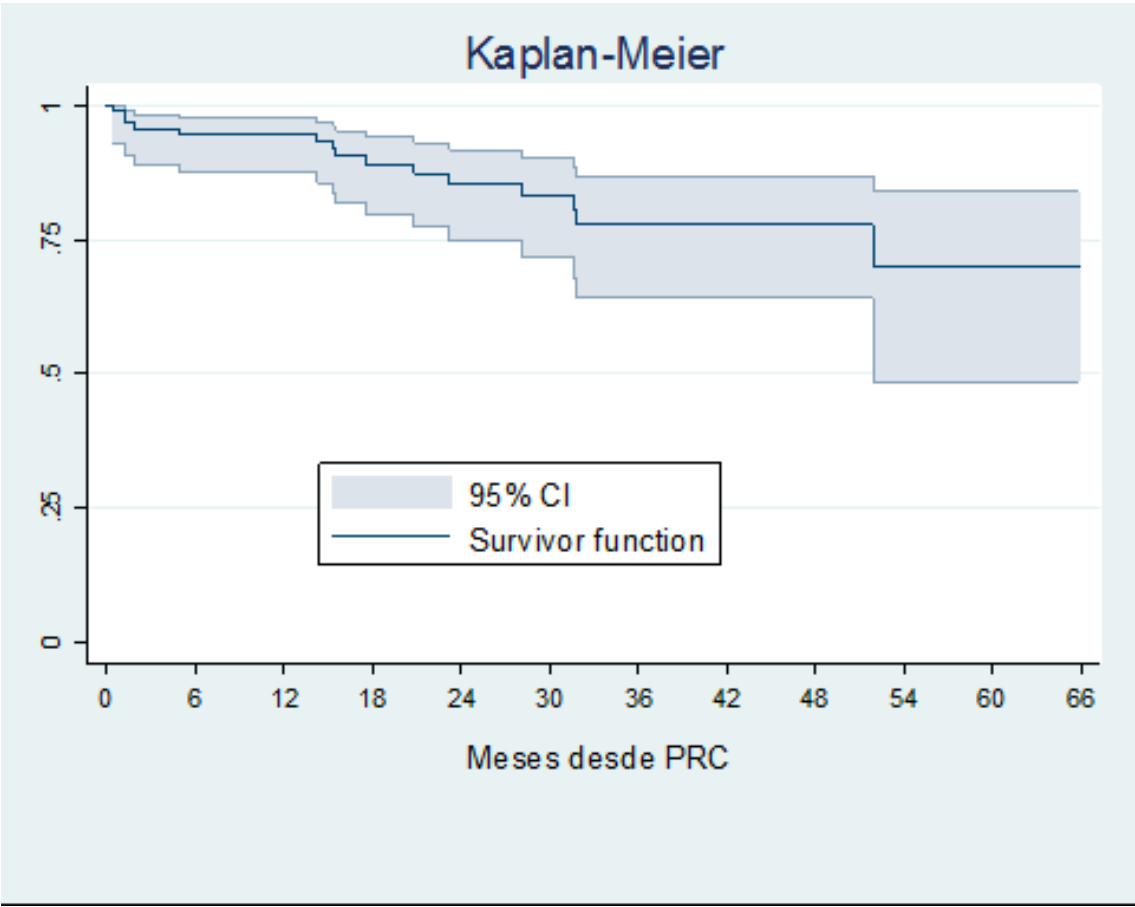

PRC: programa de rehabilitación cardiaca.
